# Supplementary material for: Calcium ions function as a booster of chromosome condensation
Source: PubMed Central journal article supplement (PMC5133622; doi:10.1038/srep38281), 2016-12-02
Supplement: srep38281-s1.pdf [file srep38281-s1.pdf]

## Calcium ions function as a booster of chromosome condensation

Rinyaporn Phengchat, Hideaki Takata, Kenichi Morii, Noriko Inada, Hideji

Murakoshi, Susumu Uchiyama, Kiichi Fukui

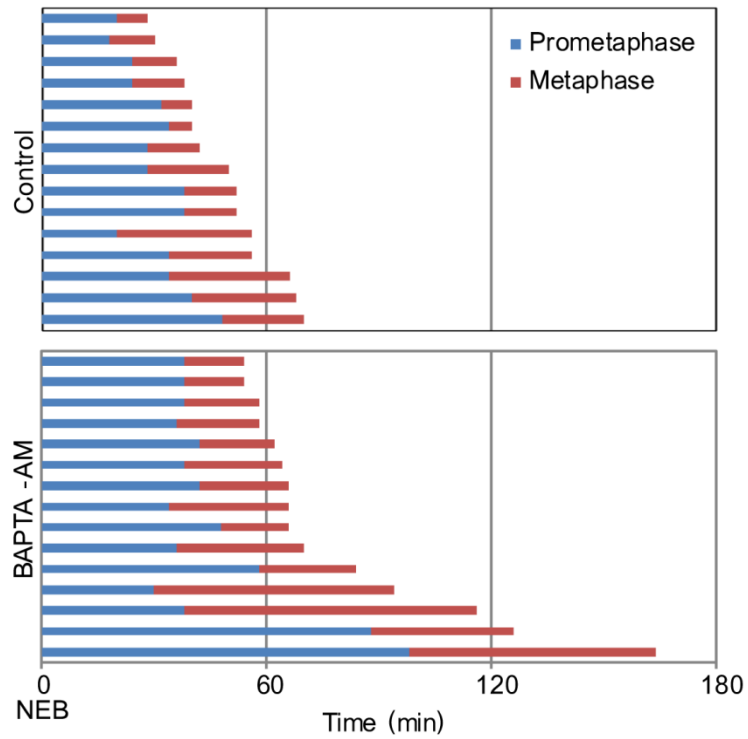

**Supplementary Figure 1.** Mitotic progression in 15 control and  $\text{Ca}^{2+}$ -depleted cells selected at random.

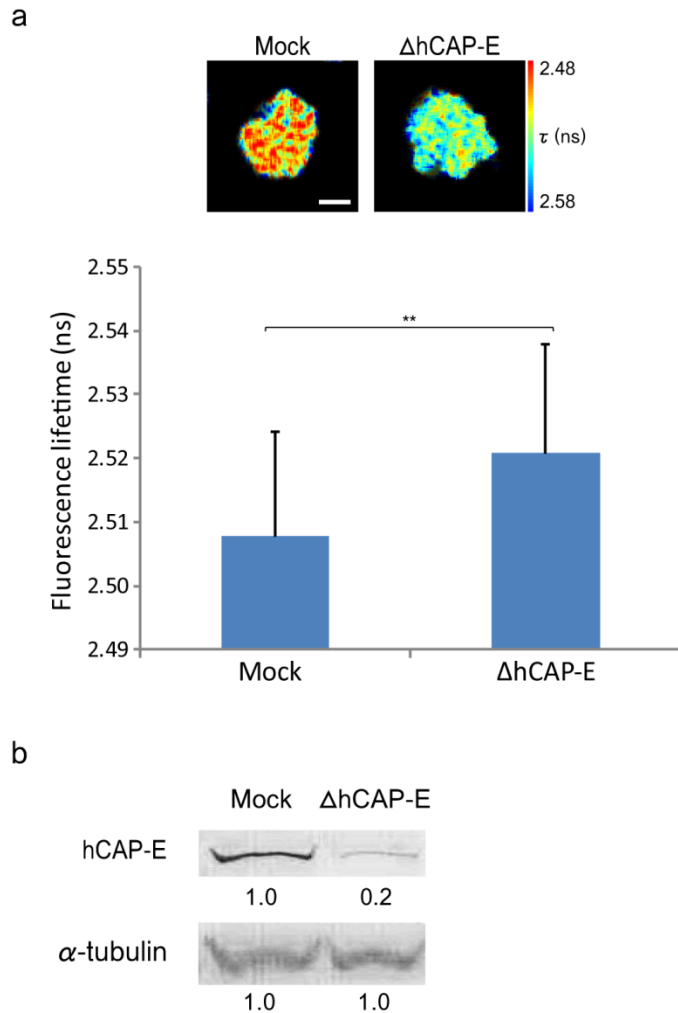

**Supplementary Figure 2.** (a) Compaction of chromosomes mitotic-arrested condensin-depleted ( $\Delta$ hCAP-E) cells was quantified by FLIM-FRET analysis using 2P-FLIM with 920 nm excitation. Pseudocolours in the images represent fluorescence lifetime of EGFP. A column graph showed mean fluorescence lifetime from 25 cells in mock, 61 cells  $\Delta$ hCAP-E. (b) Western blot of hCAP-E protein from whole cell extract of HeLa<sup>WT</sup> after the depletion of hCAP-E by siRNA transfection. Alpha-tubulin was used as control. The relative band intensity ratios to mock are shown below. Error bars indicate standard deviations. Bar, 5  $\mu$ m.

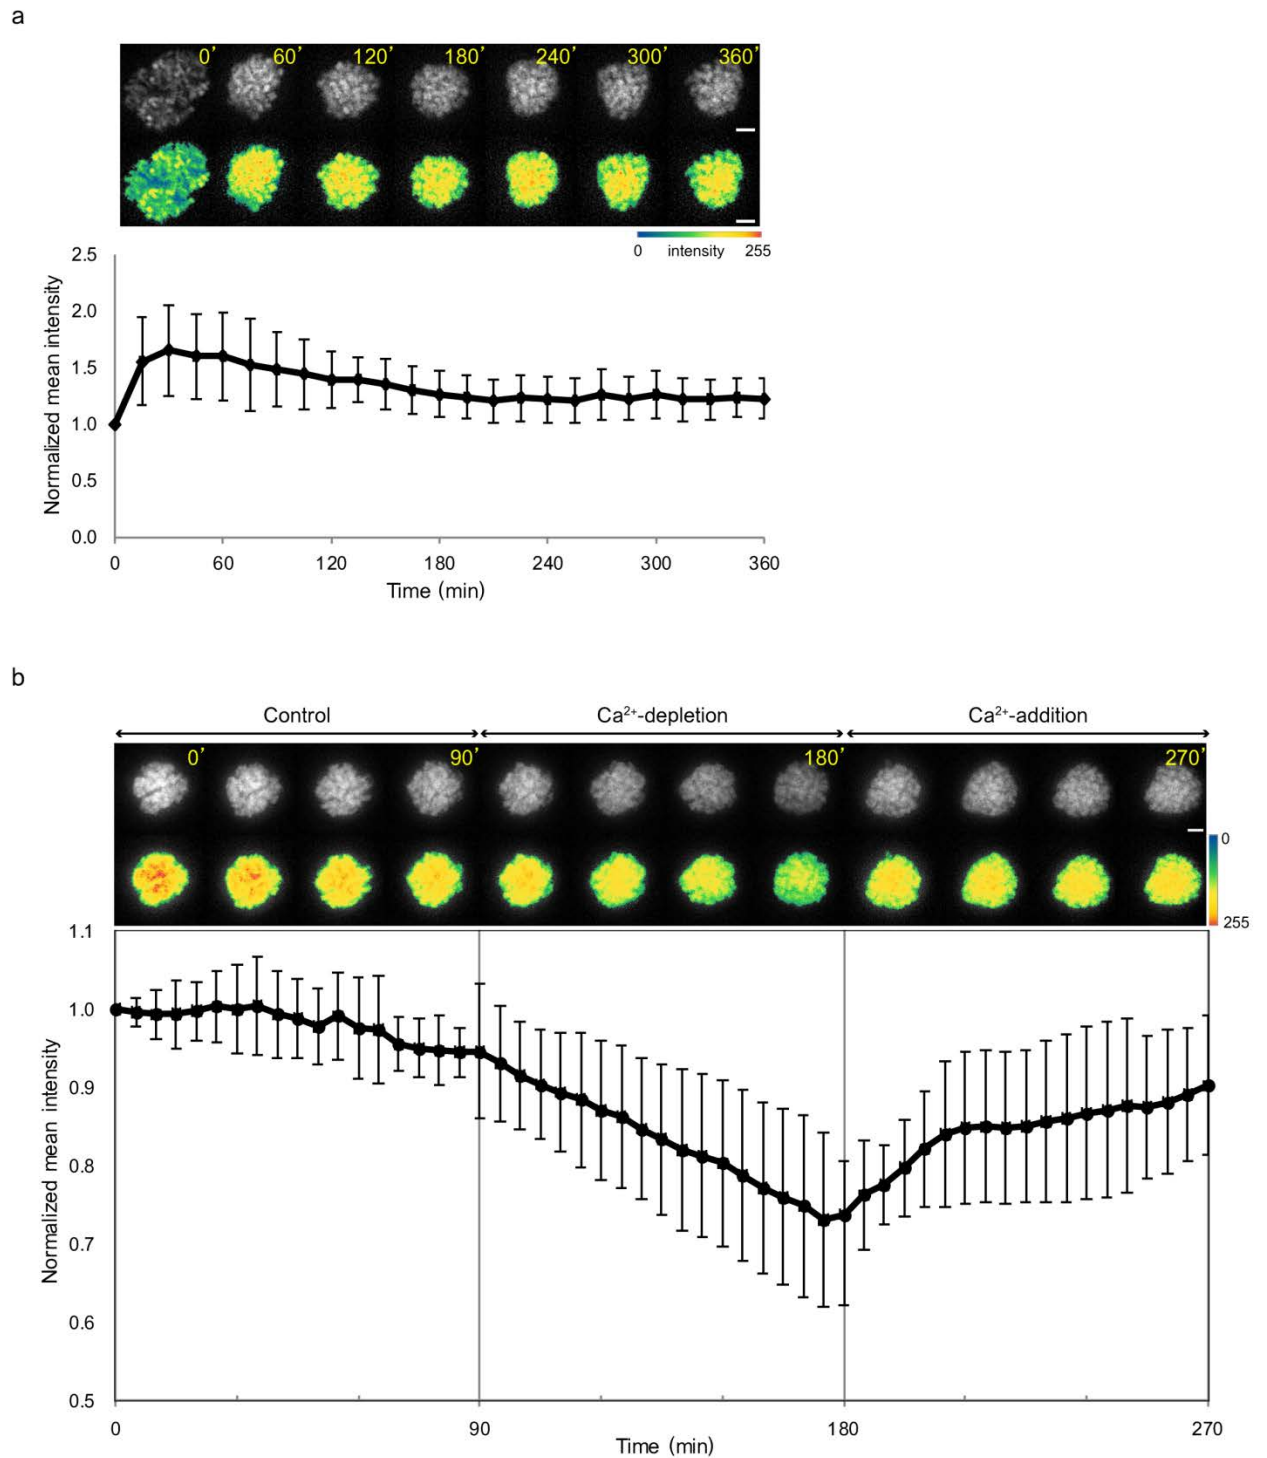

**Supplement Figure 3.** Intracellular  $\text{Ca}^{2+}$ -altered chromatin compaction levels *in vivo*.

(a) Chromatin compaction levels of nocodazole-arrested HeLa<sup>H1.2-GFP</sup> cells were measured using fluorescent intensity of EGFP. Three-dimensional images of whole chromosomes starting from NEB were acquired every 15 min for 6 h. Plot graph

showing the quantification of chromosome condensation under mitotic arrest ( $n = 6$  cells). **(b)** Fluorescent images of mitotic arrested HeLa<sup>H1.2-GFP</sup> sequentially incubated in Ca<sup>2+</sup>-depleted and Ca<sup>2+</sup>-re-added medium. A graph represents the quantification of chromatin compaction levels as normalized mean fluorescent intensity of EGFP ( $n = 15$  cells). Error bars indicate standard deviations. Bar, 5  $\mu\text{m}$ .

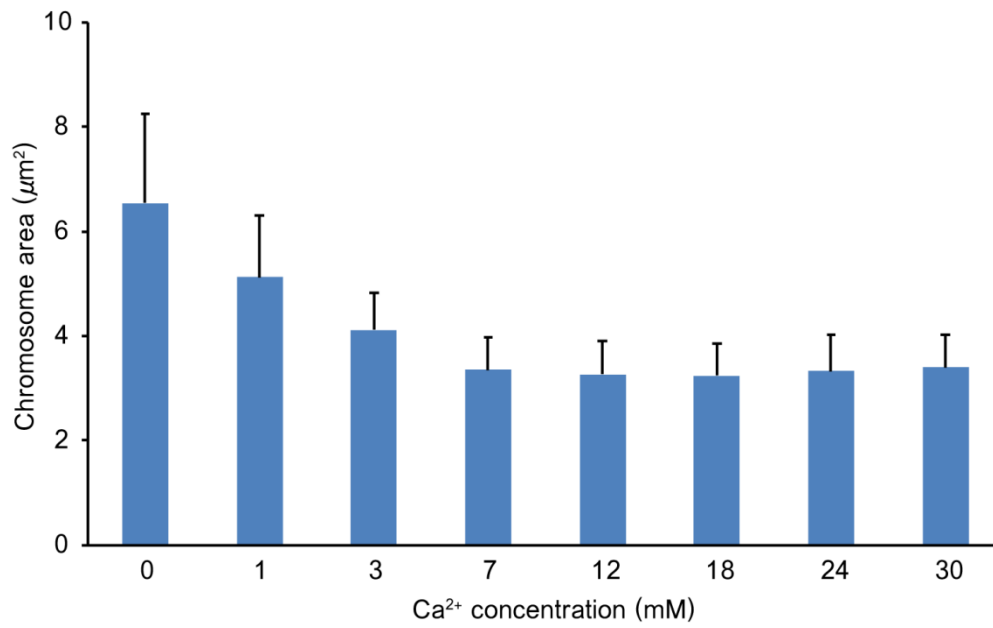

**Supplementary Figure 4.** Average area of PA chromosomes treated with XBE buffer containing various concentrations of  $\text{CaCl}_2$  ( $n = 100$  chromosomes).
